# Supplementary material for: Genome-Wide Identification of NBS-Encoding Resistance Genes in Sunflower (Helianthus annuus L.)
Source: MDPI journal article supplement (doi:10.3390/genes9080384), 2018-07-30

**Supplementary File S1a.** The motif sequence Logos in the sunflower CNL family of R proteins

**Motif 14: C1**

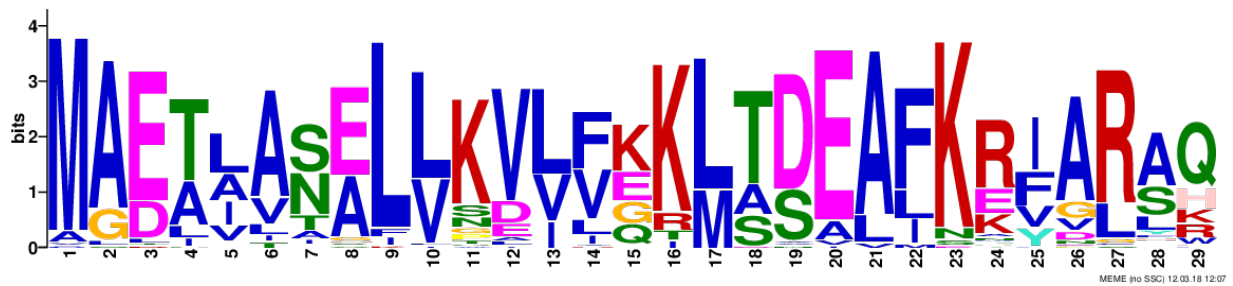

**Motif 3: C2**

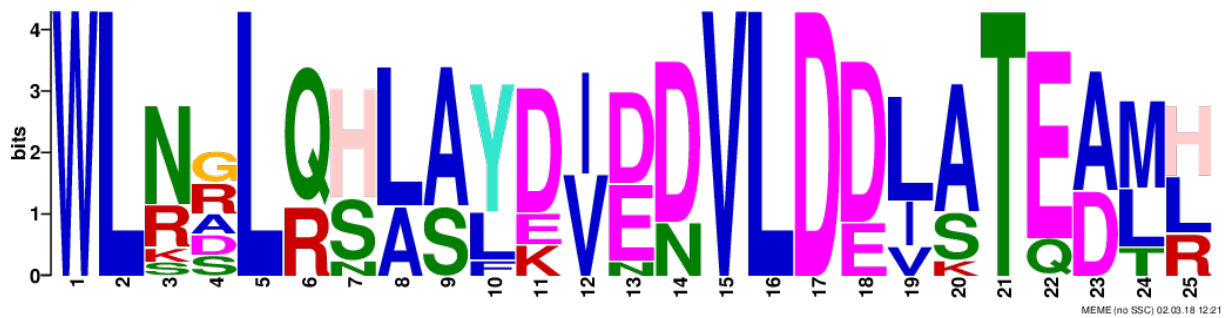

**Motif 10: C3**

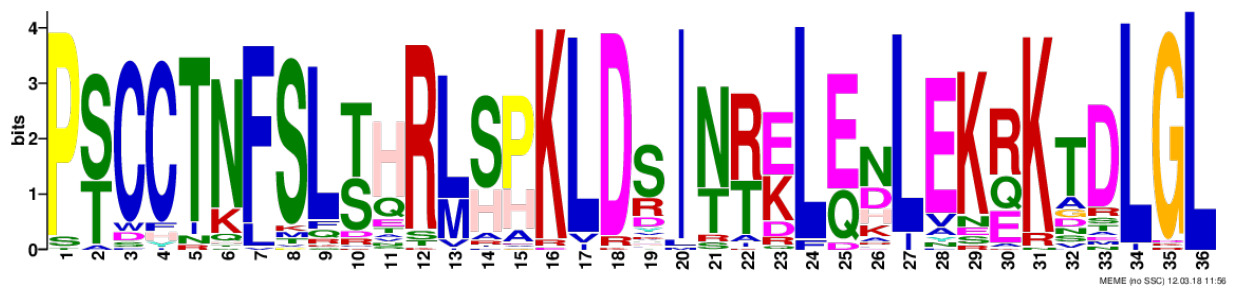

## Motif 2: P loop

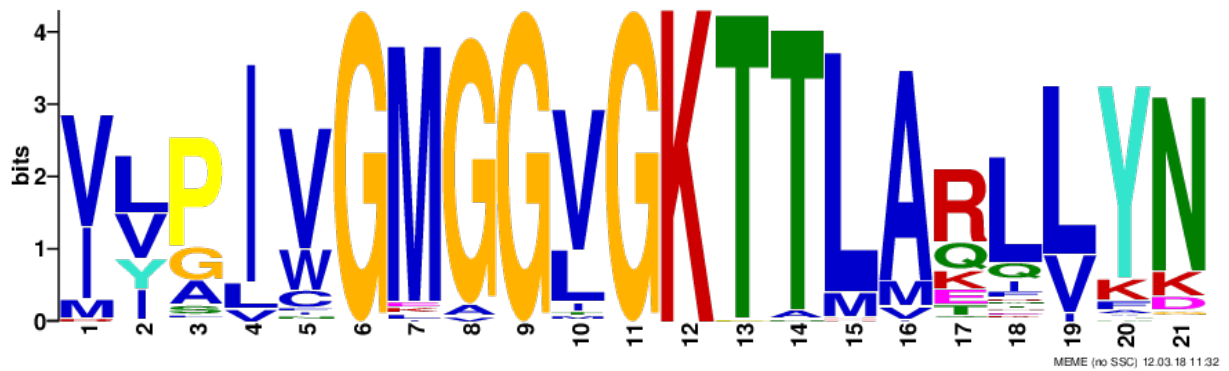

## Motif 8: RNBS A non TIR

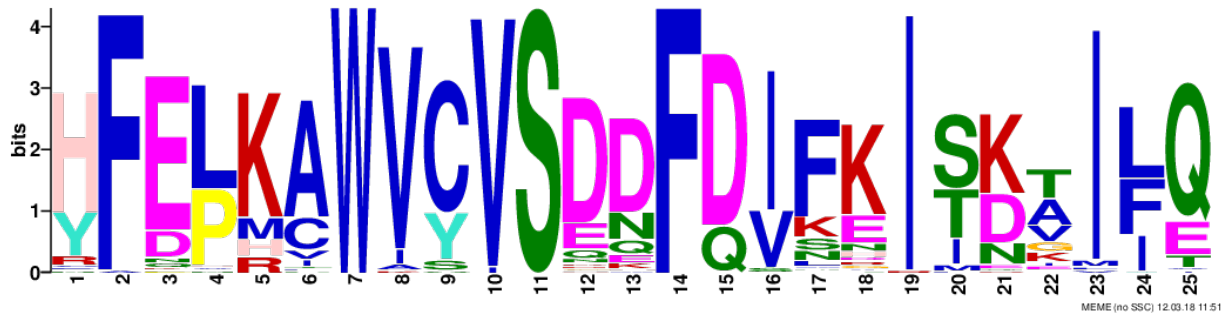

## Motif 4: Kinase 2 + RNBS B

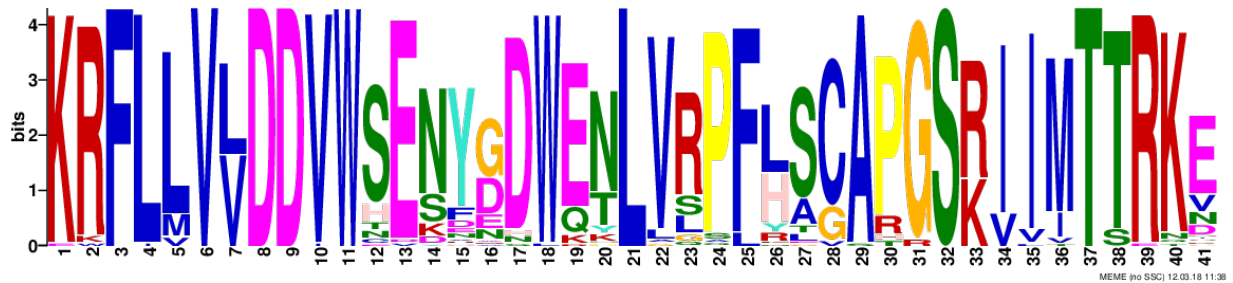

Motif 15: RNBS C

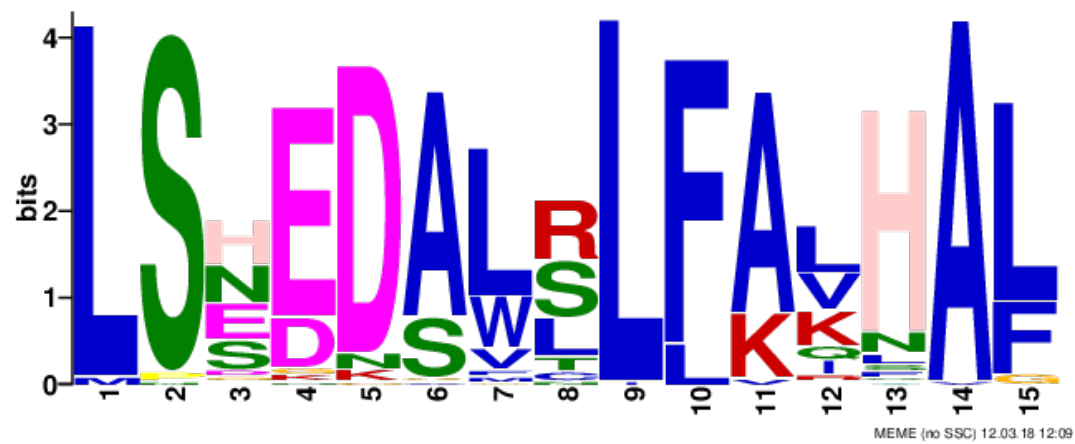

Motif 7: GLPL

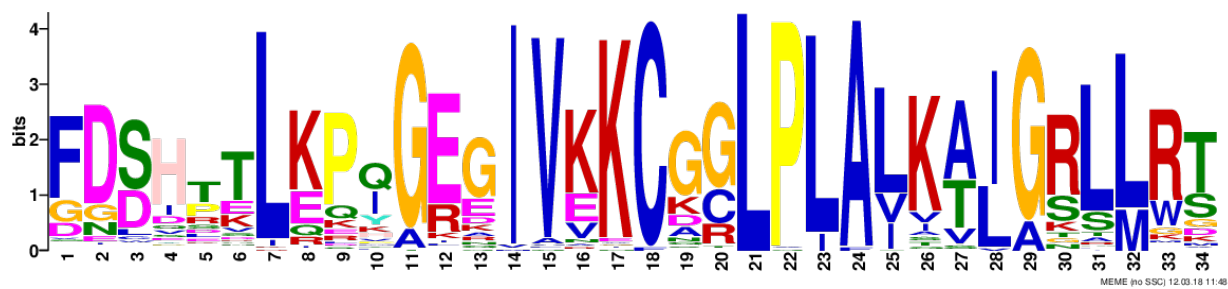

Motif 20:

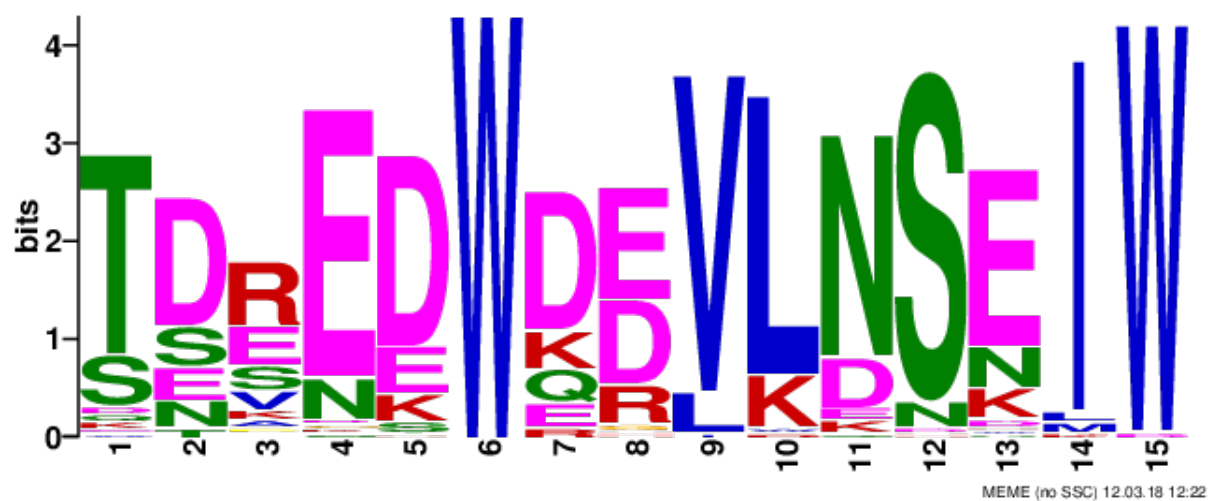

Motif 5: RNBSD + CNBS1

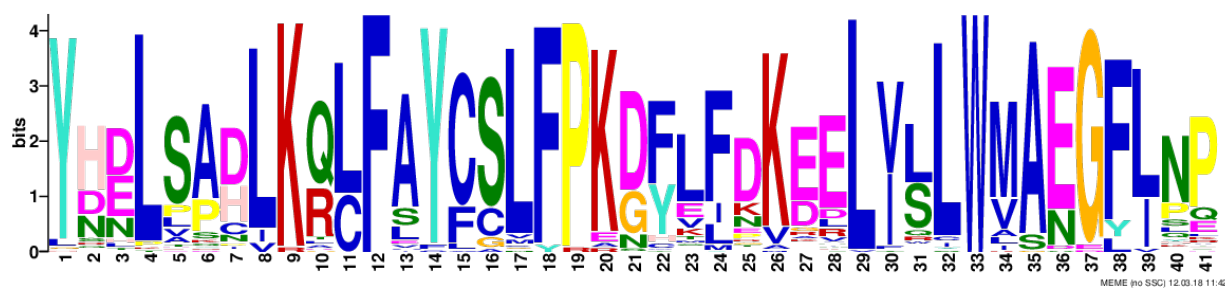

Motif 1: MHDL

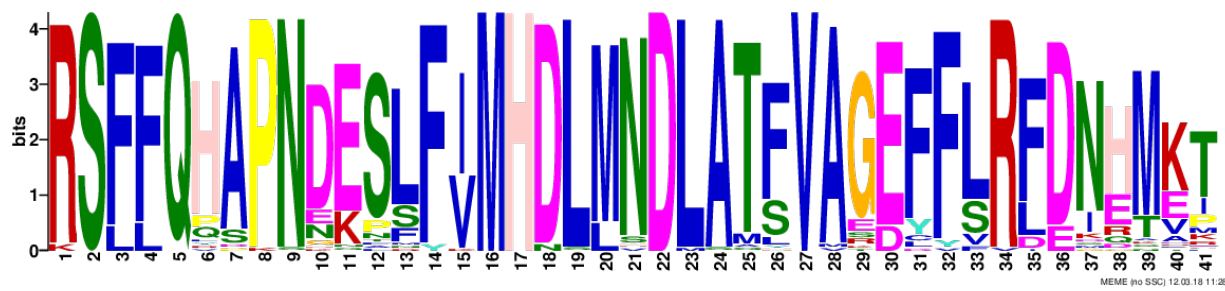

Motif 11:

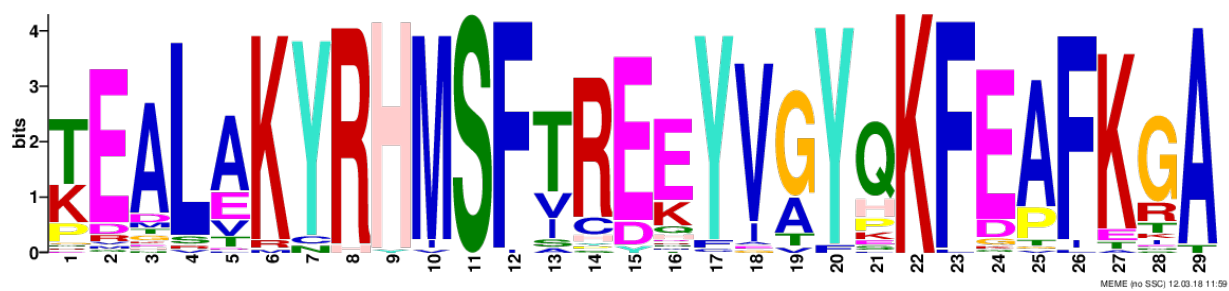

Motif 18: L1

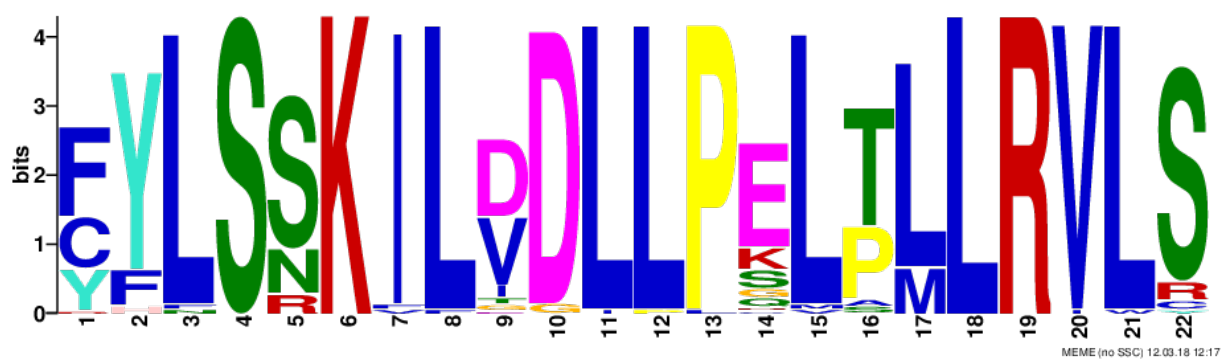

Motif 6: L2

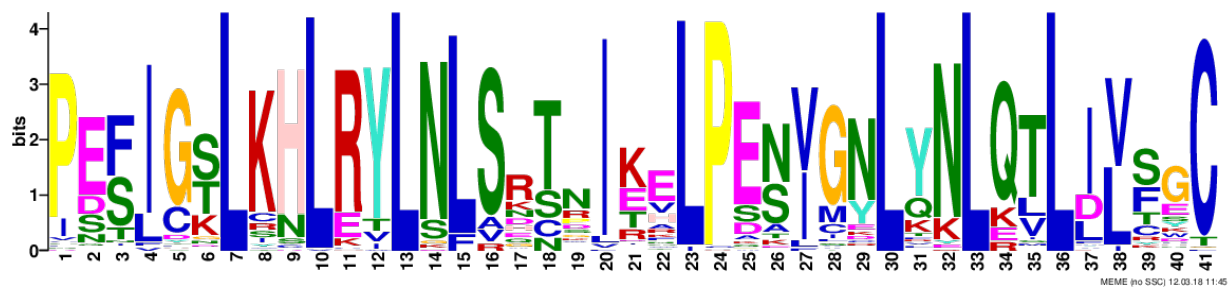

Motif 16: L3

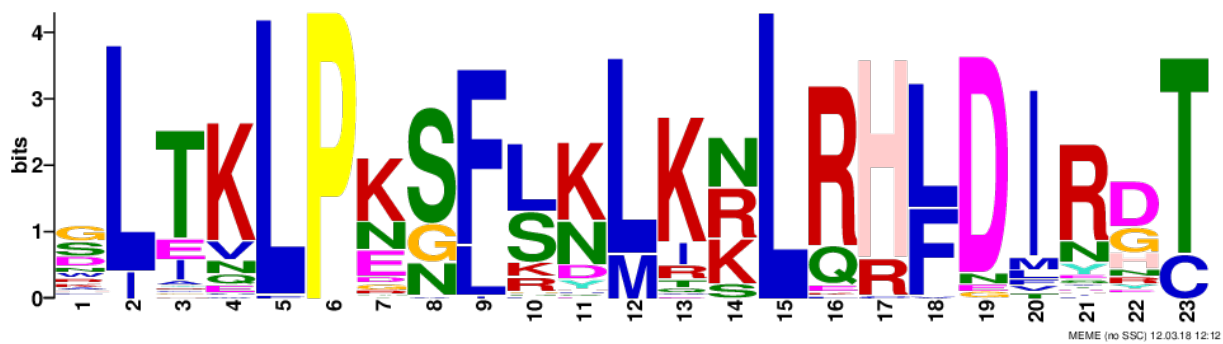

## Motif 9:L4

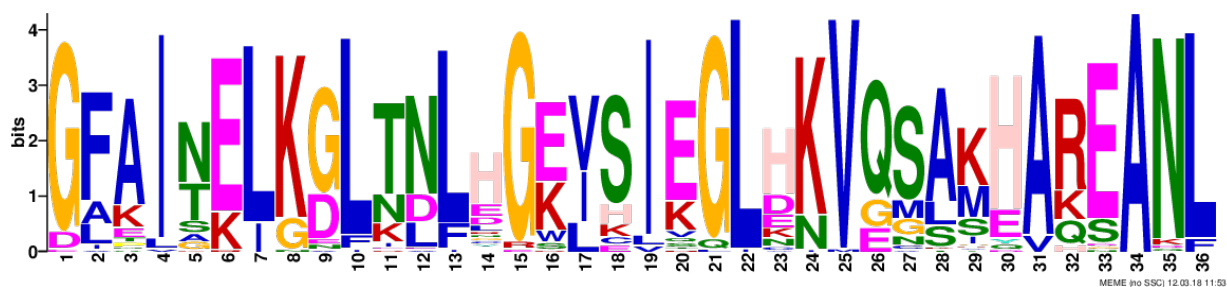

## Motif 12:

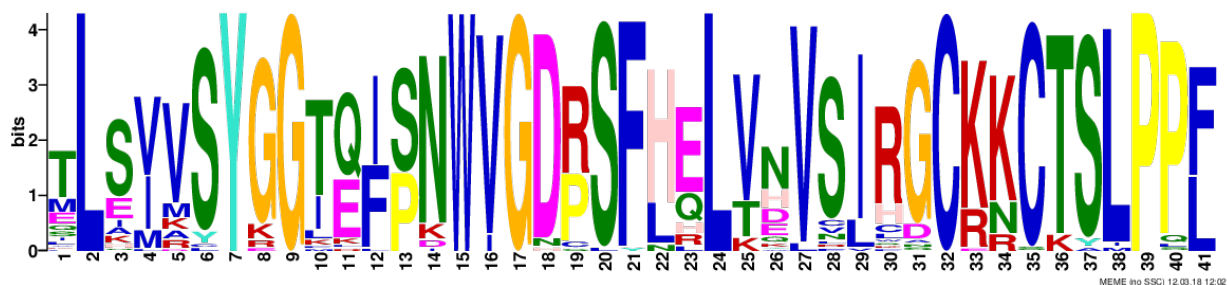

## Motif 13:

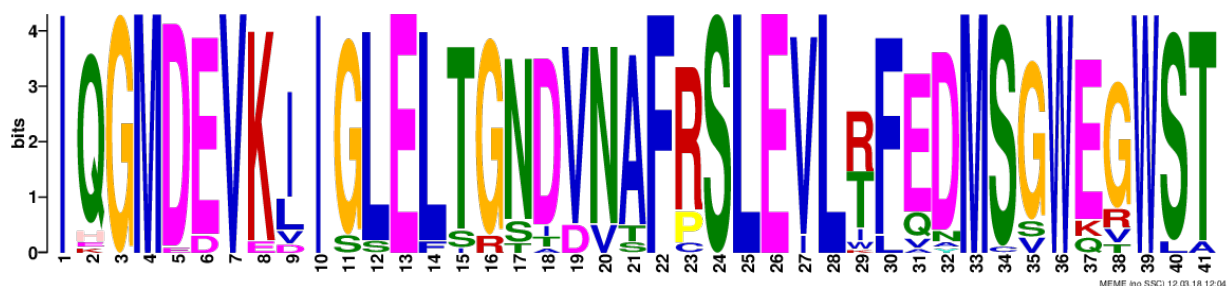

## Motif 17:L5

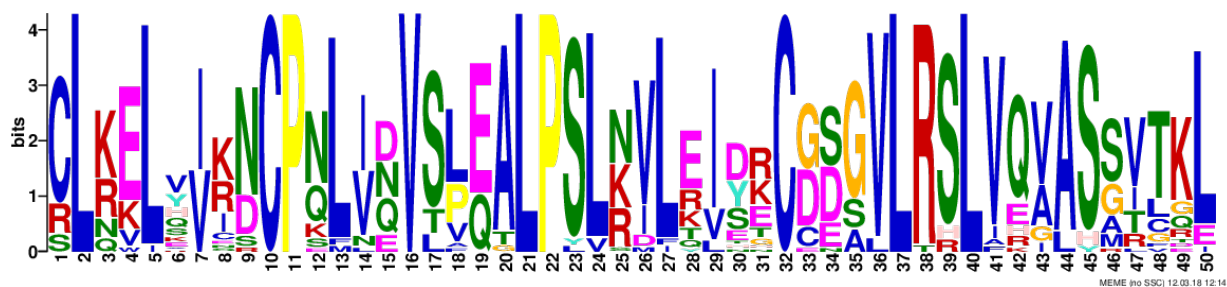

Motif 19:L6

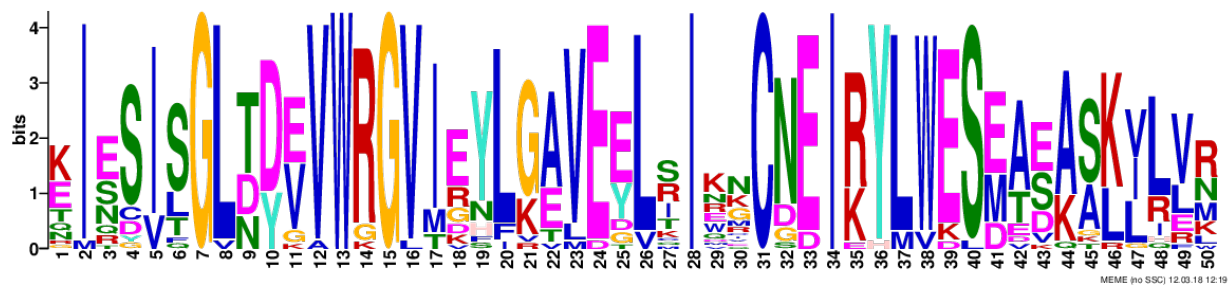

### Motif 19:

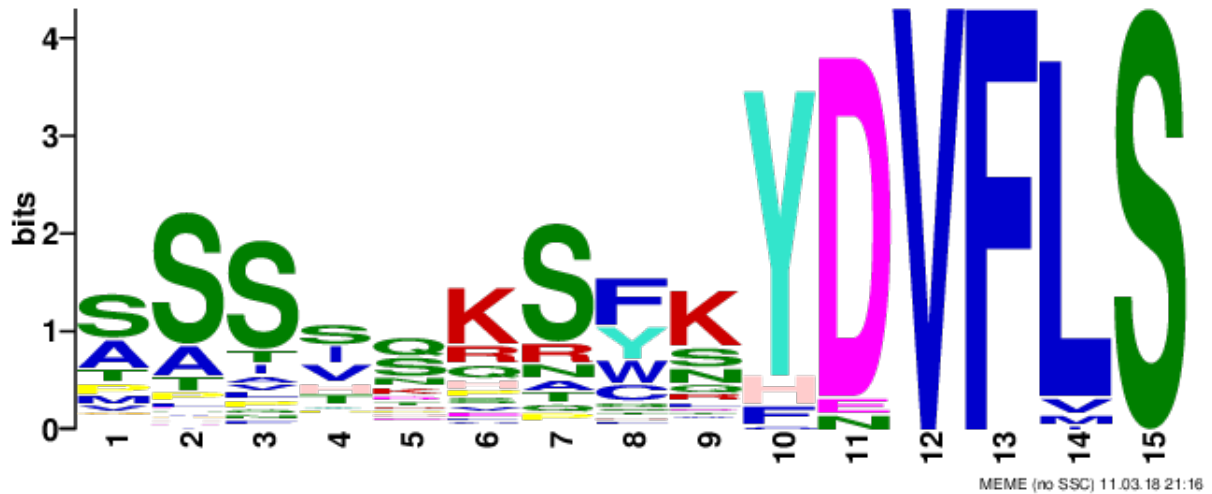

### Motif 1: T1

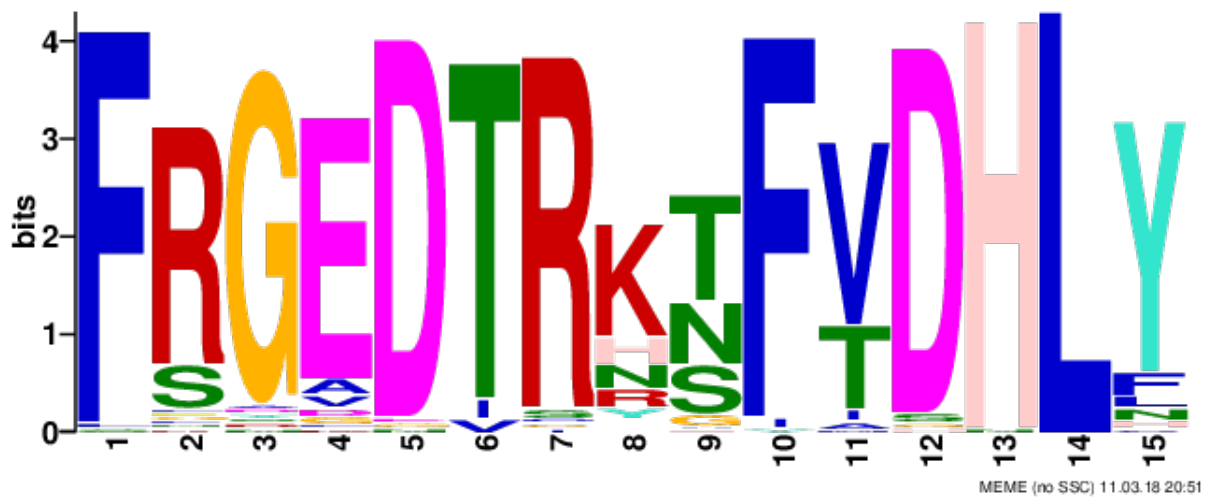



Motif 8:

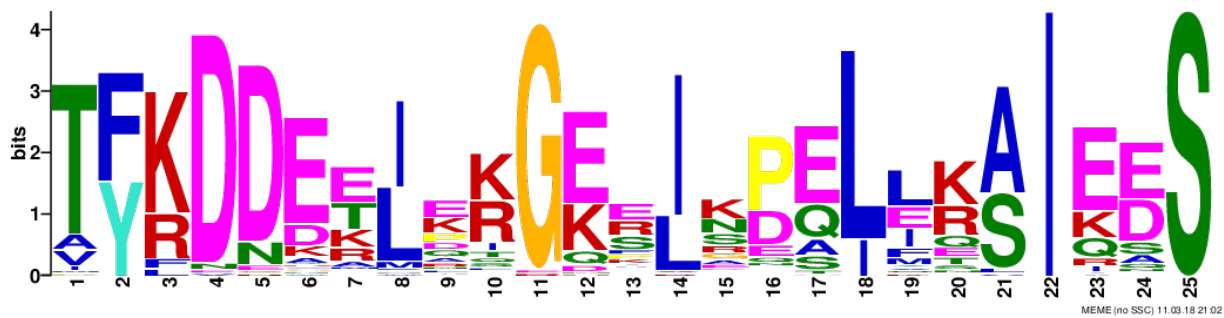

Motif 2: TIR4

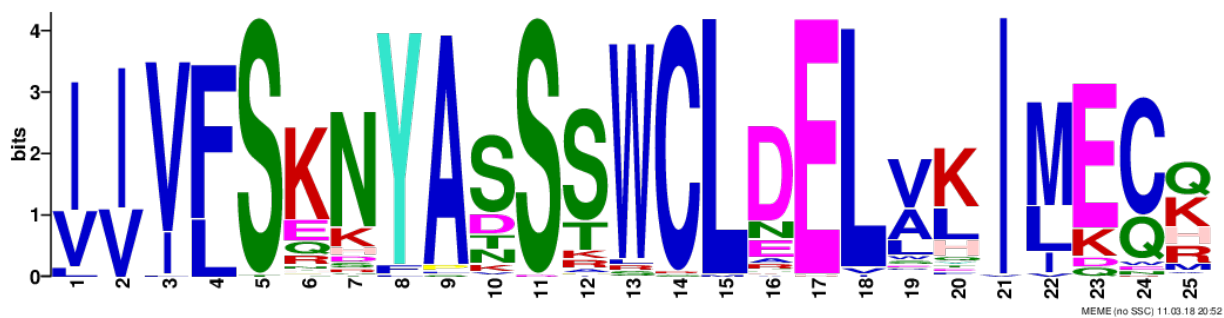

Motif 3: TIR 2

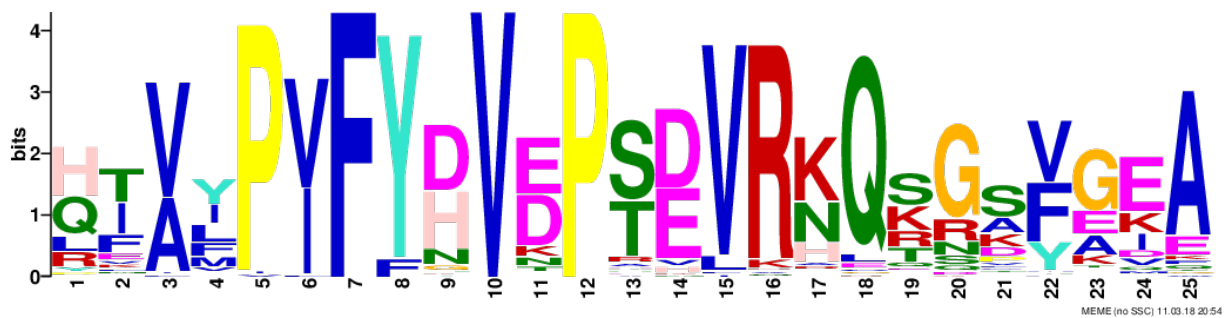

### Motif 9: TIR 3

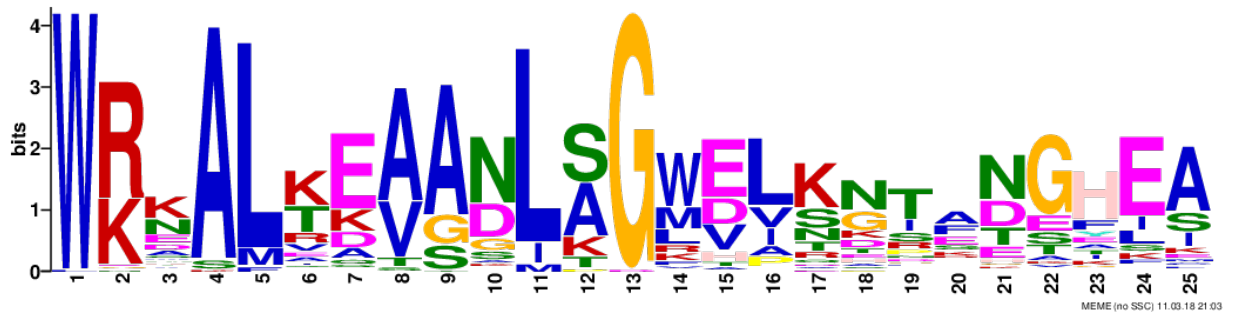

### Motif 15:

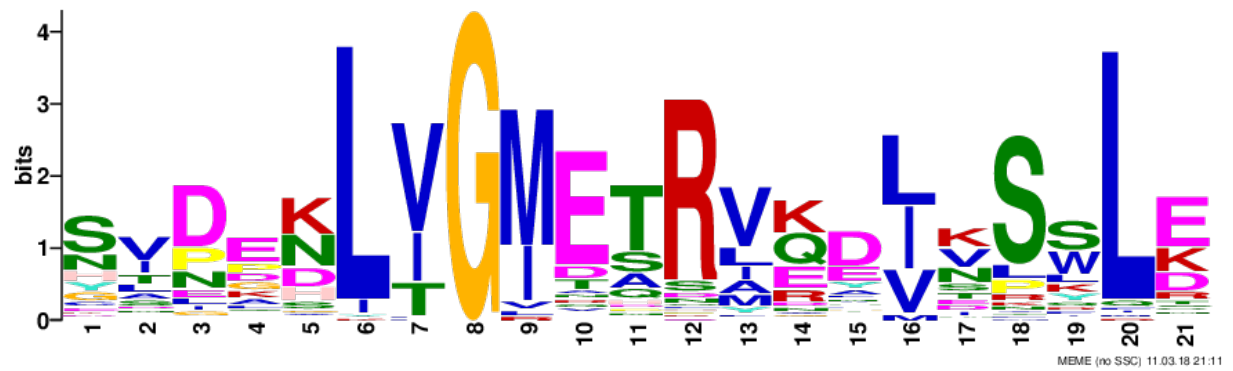

### Motif 4: P loop

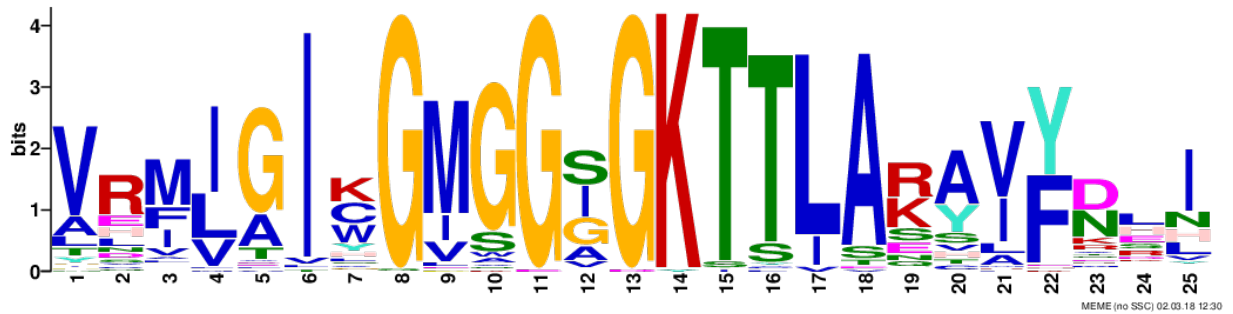

Motif 14:

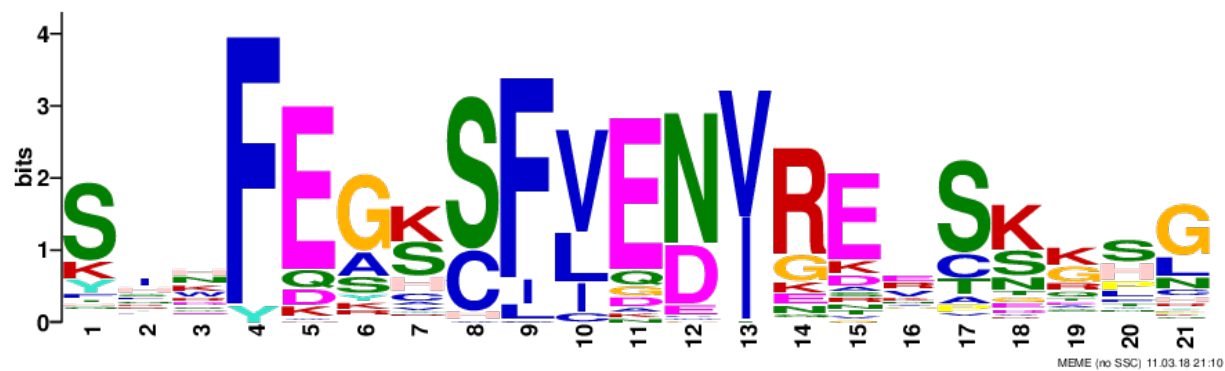

Motif 20: RNBS A

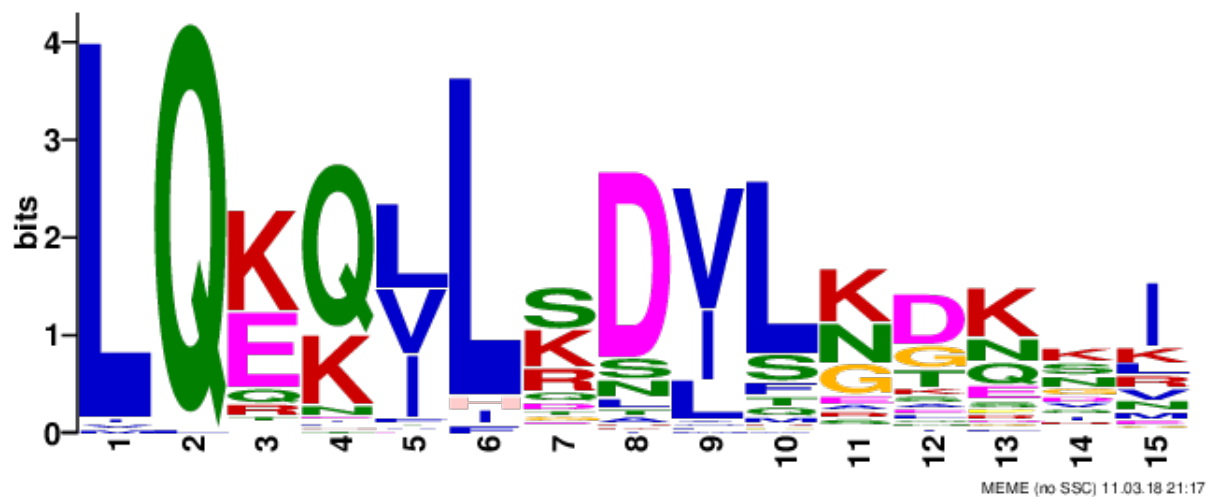

Motif 5: Kinase 2

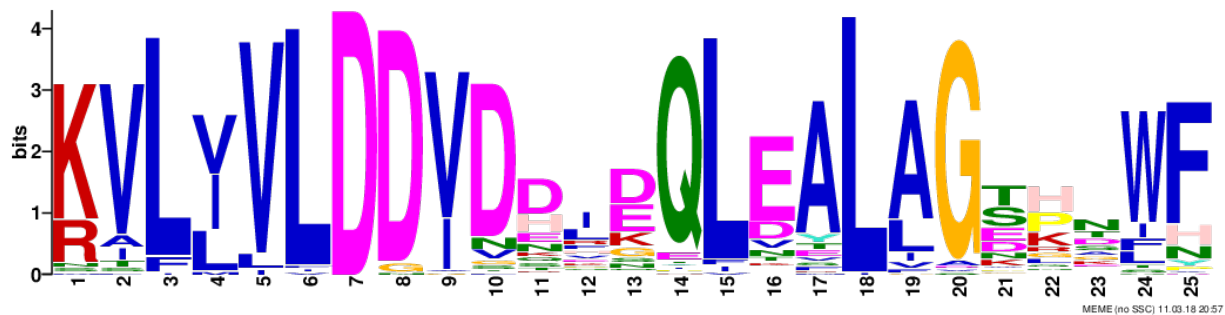

Motif 10: RNBS B

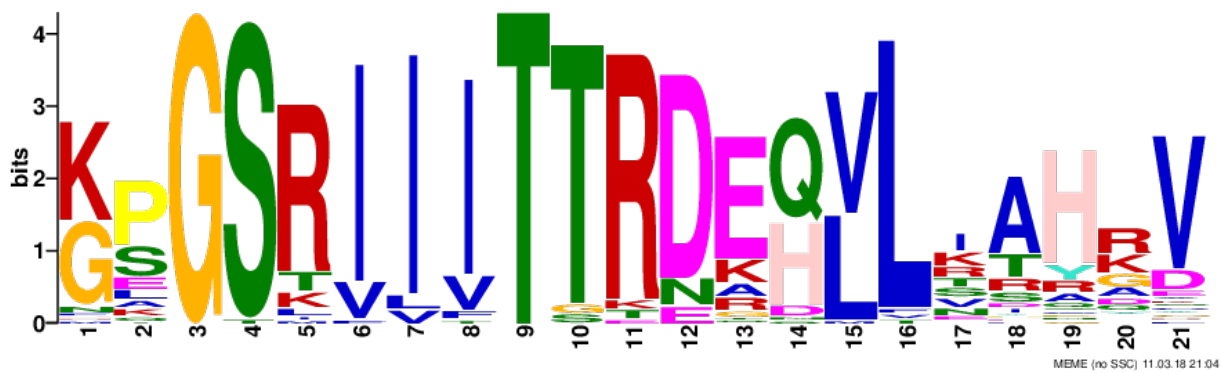

Motif 13: RNBS C

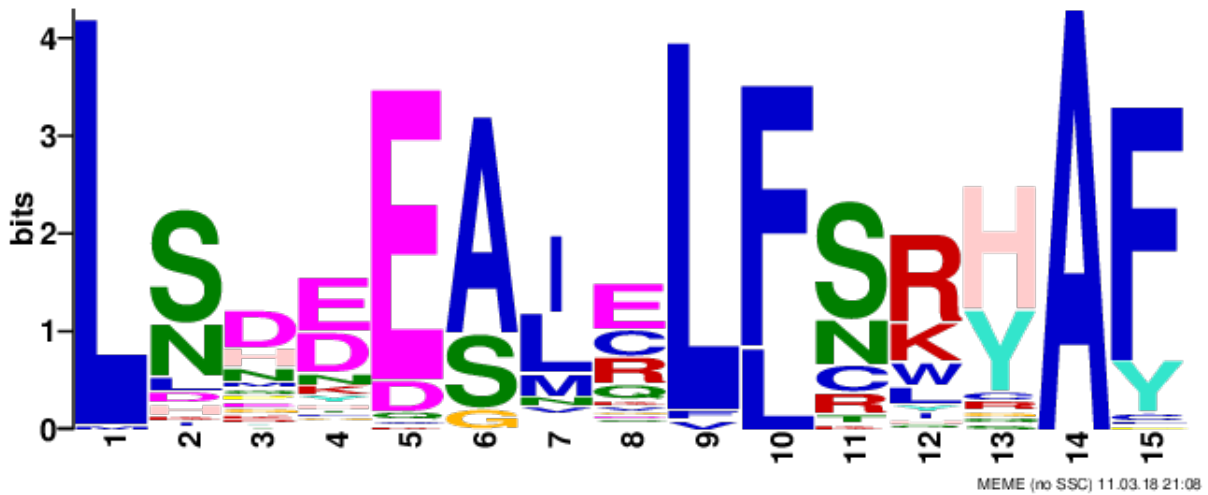

Motif 6: GLPL

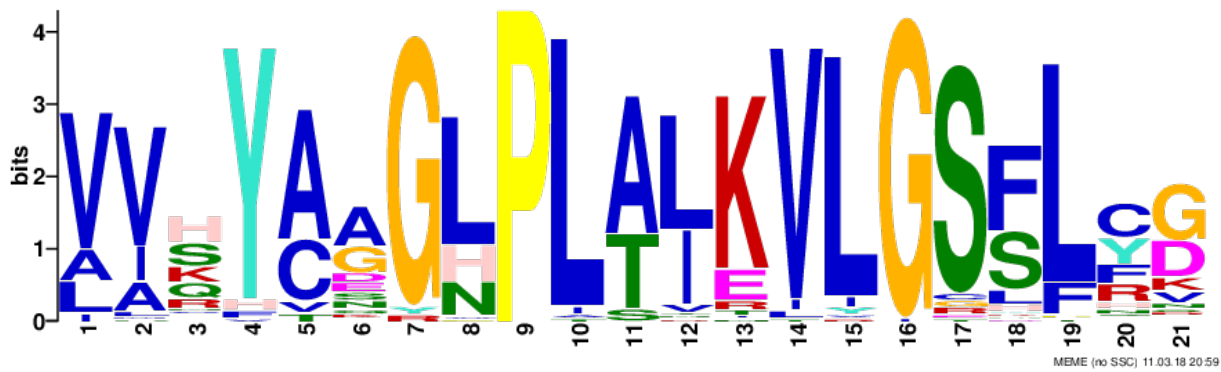

Motif 17: TNBSI

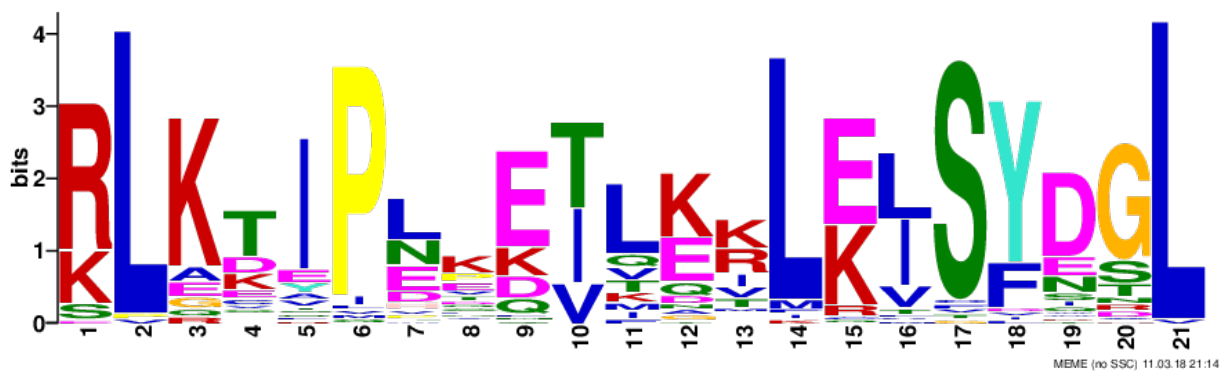

Motif 12: RNBS D

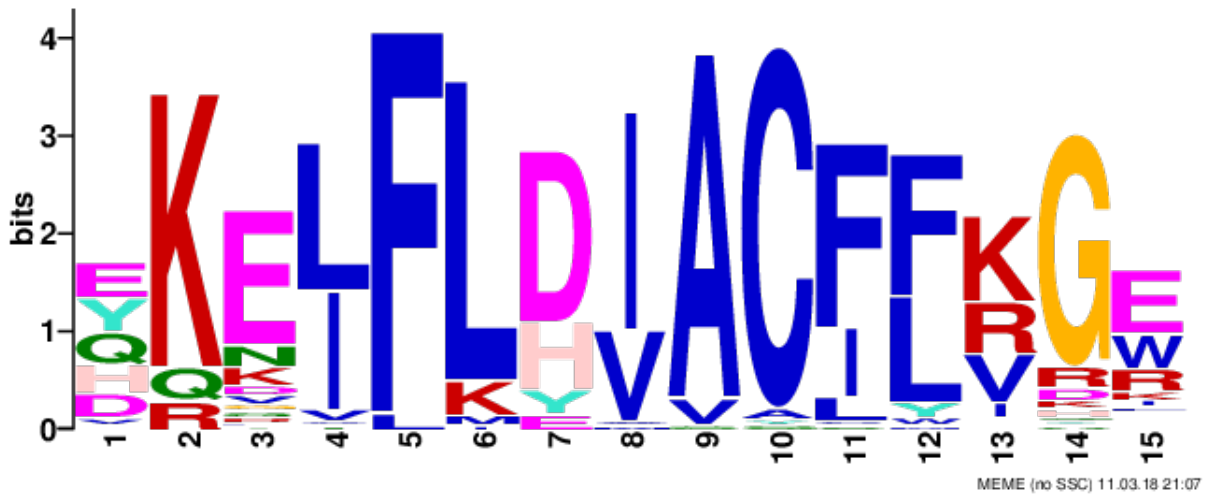

Motif 11:

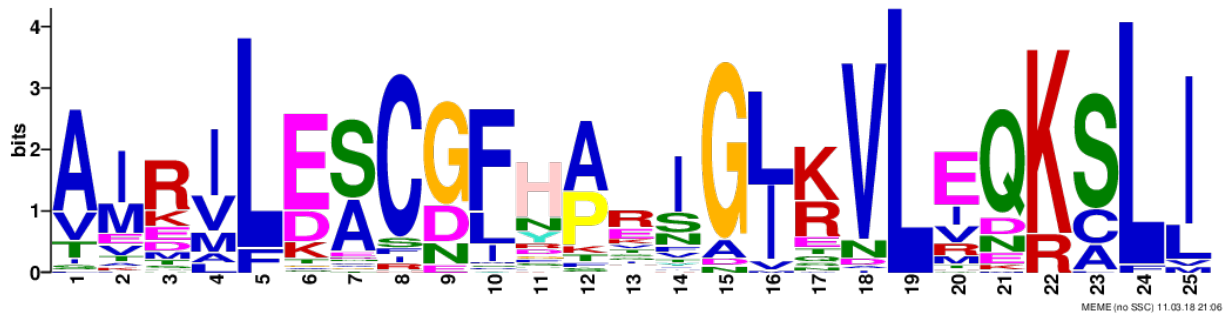

Motif 7: MHDL

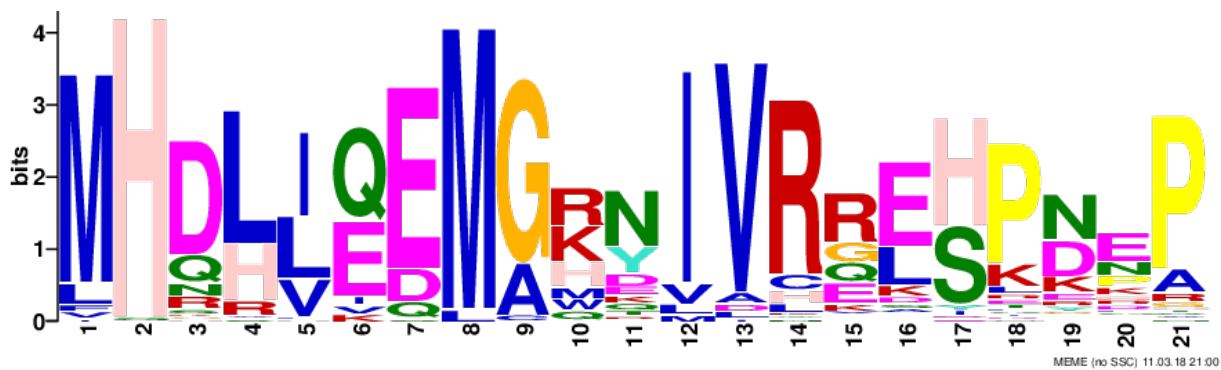

Motif 18: L1

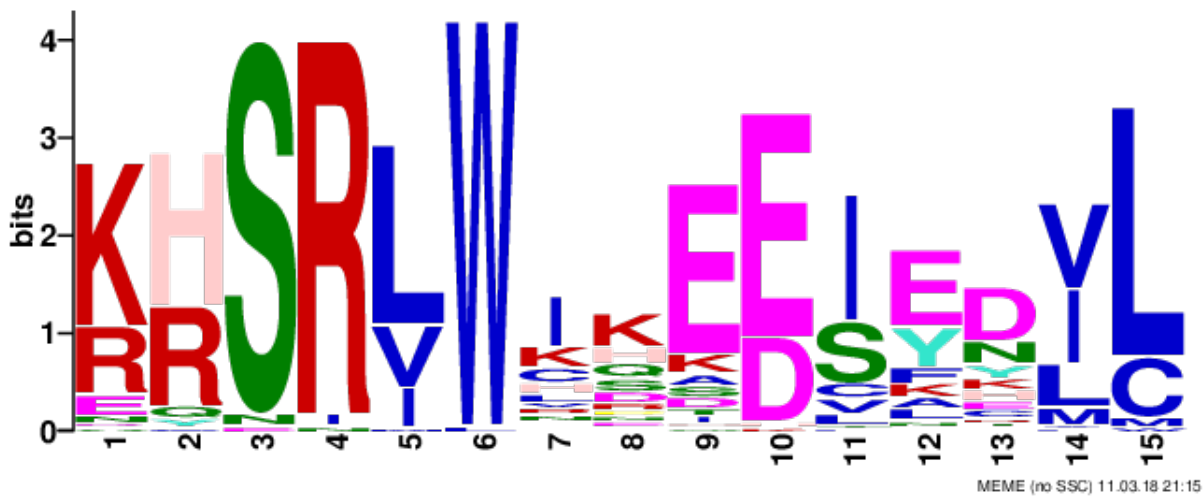

Motif 16:L2

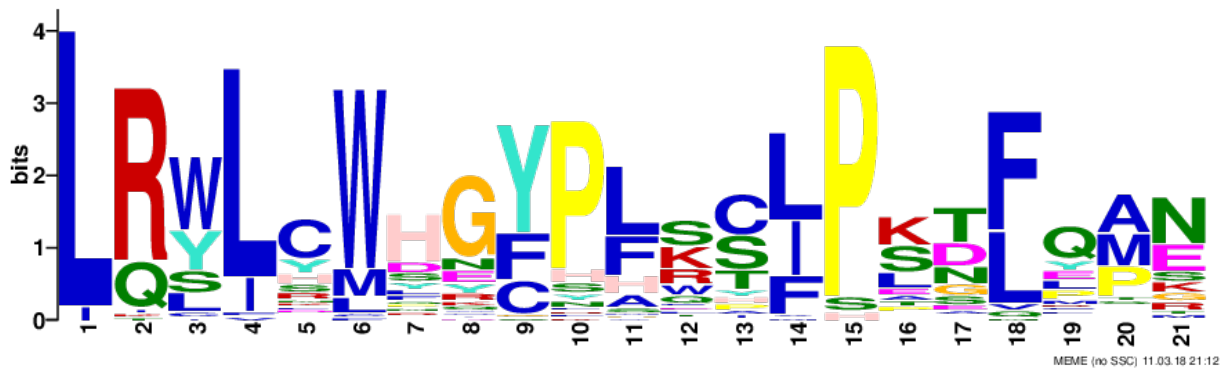

**Supplementary File S1c.** The motif sequence Logos in the sunflower RNL family of R proteins

**Motif 19:RPW8-1**

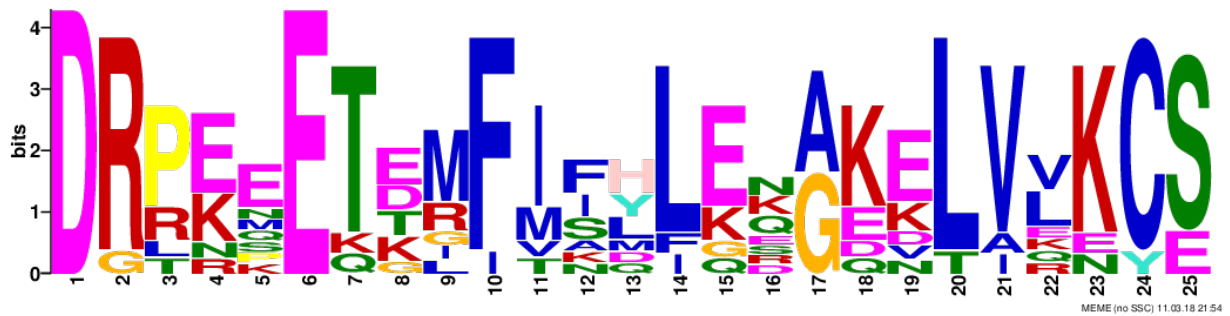

**Motif 8:RPW8-2**

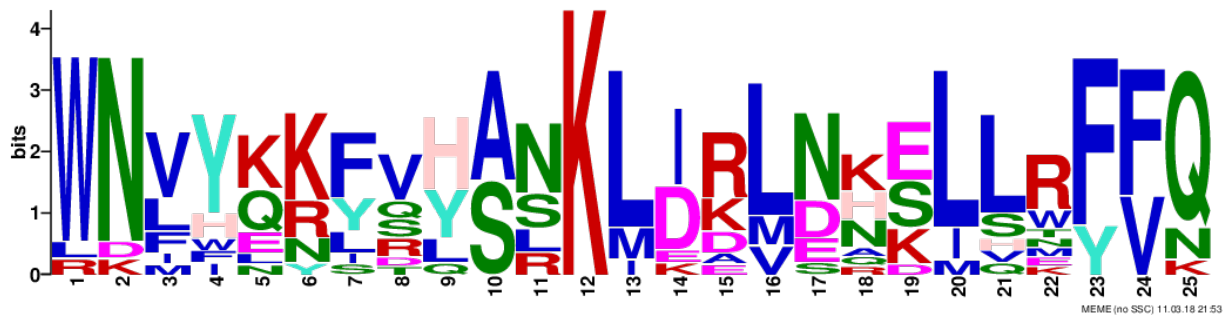

**Motif 1: P-LOOP**

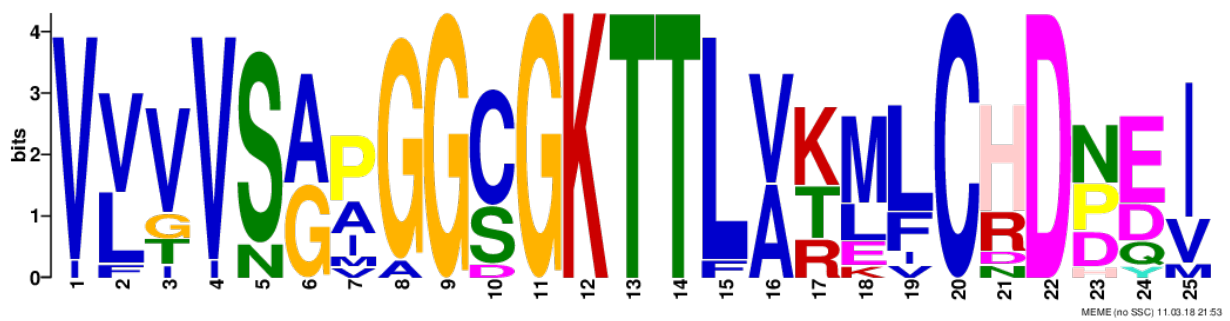

**Motif 14: RNBS A**

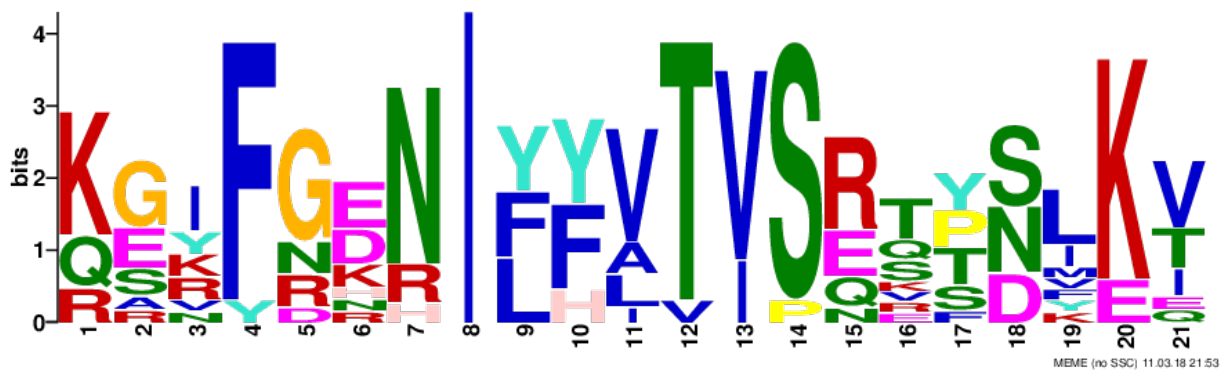

Motif 20:

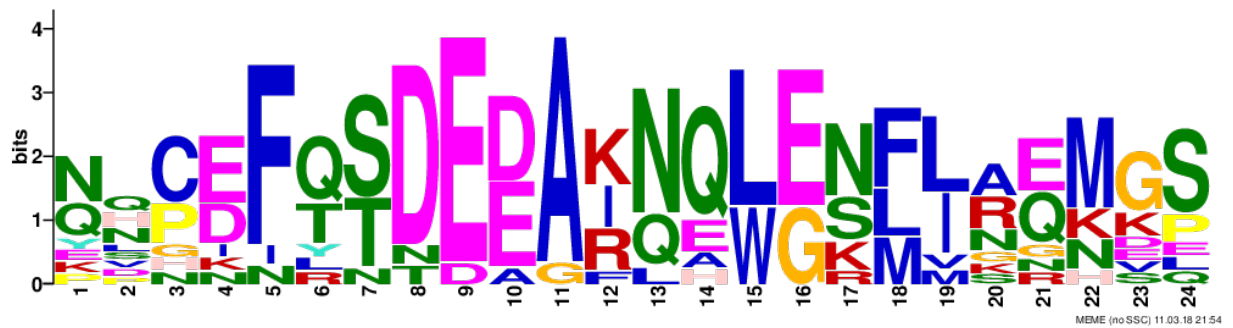

Motif 18: Kinase 2

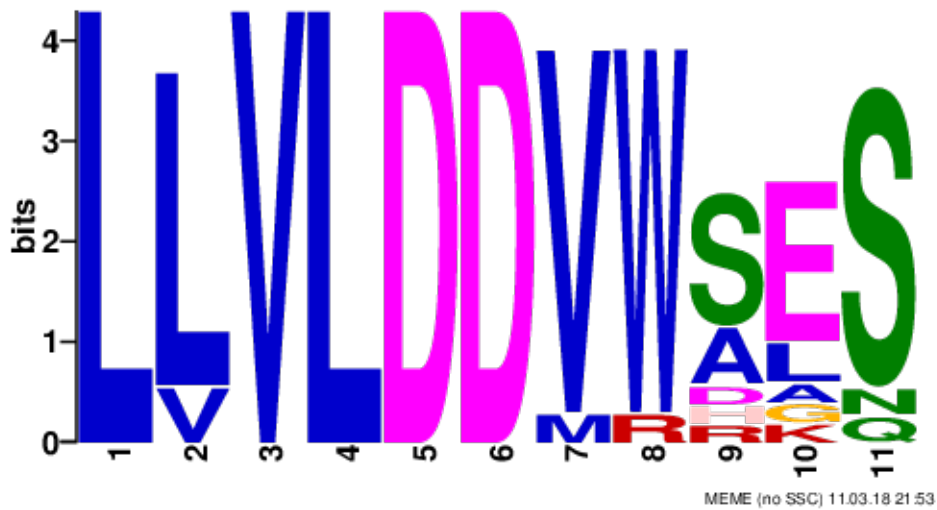

Motif 5: RNBS B



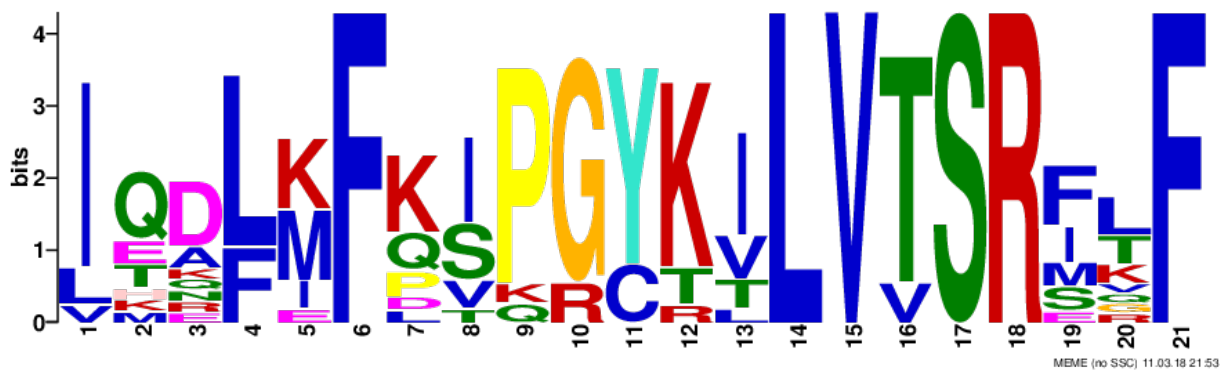

Motif 6: RNBS C

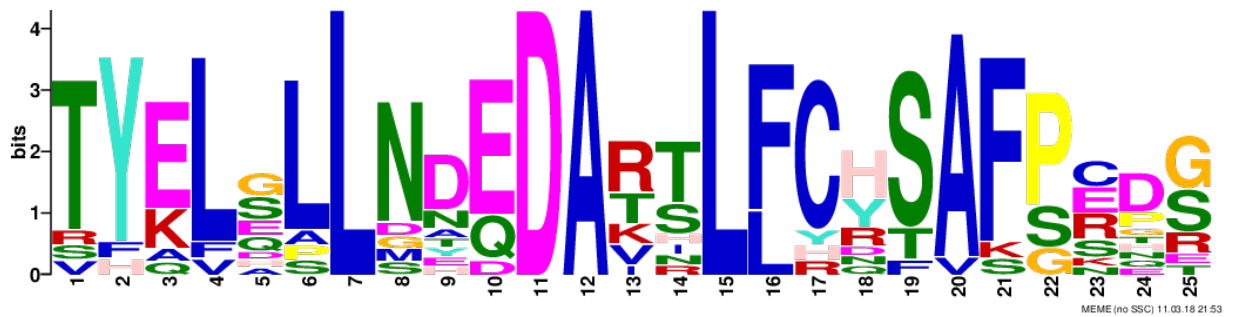

Motif 3: GLPL

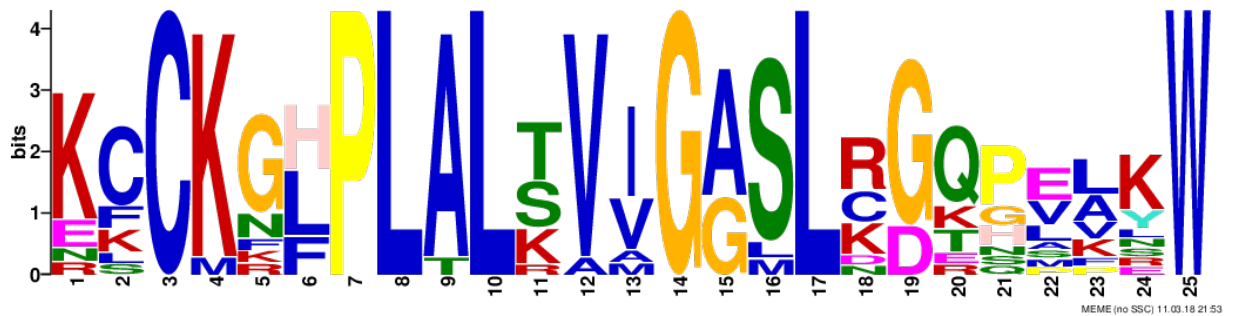

Motif 2: RNBS D

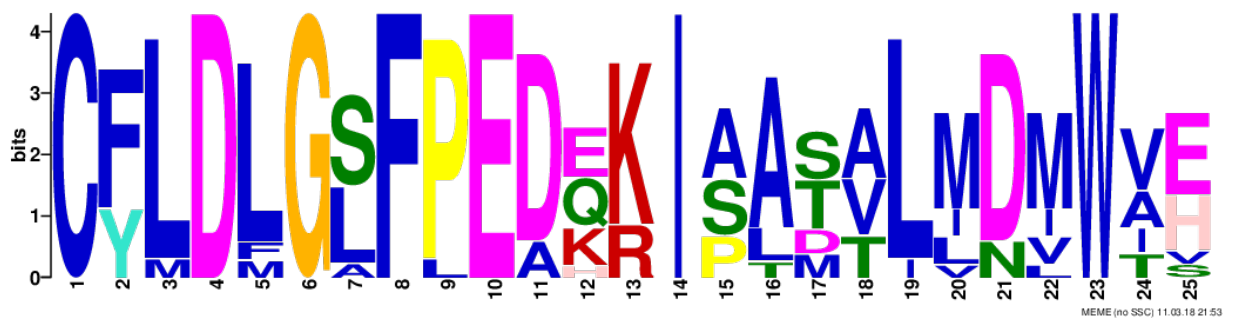

Motif 16:

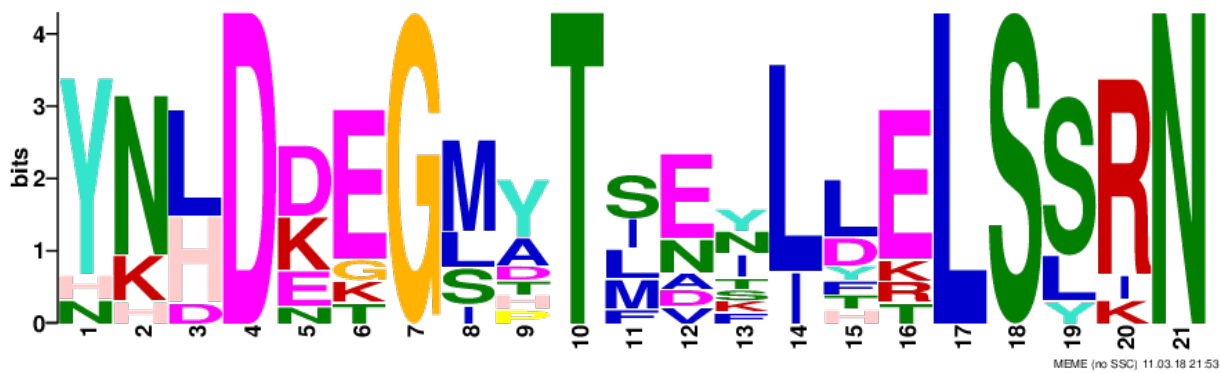

Motif 4: QHDL

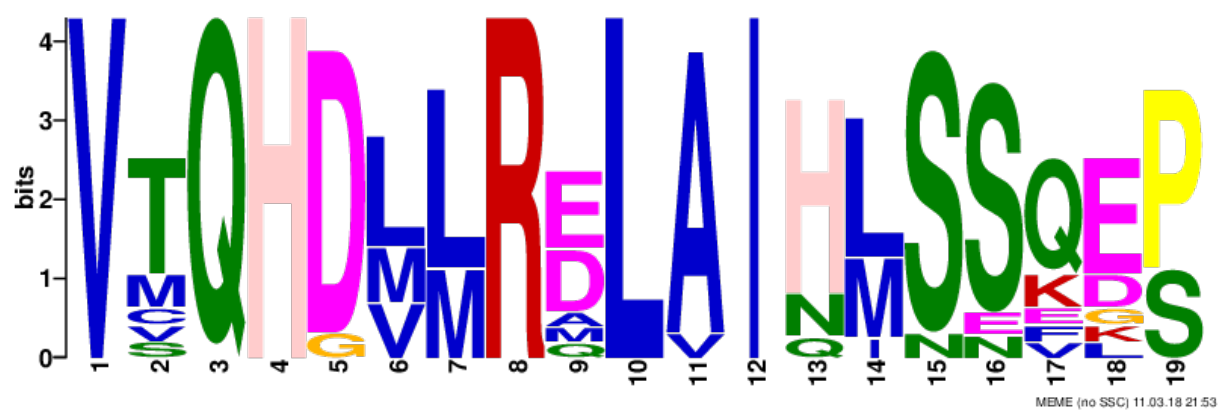

Motif 10:

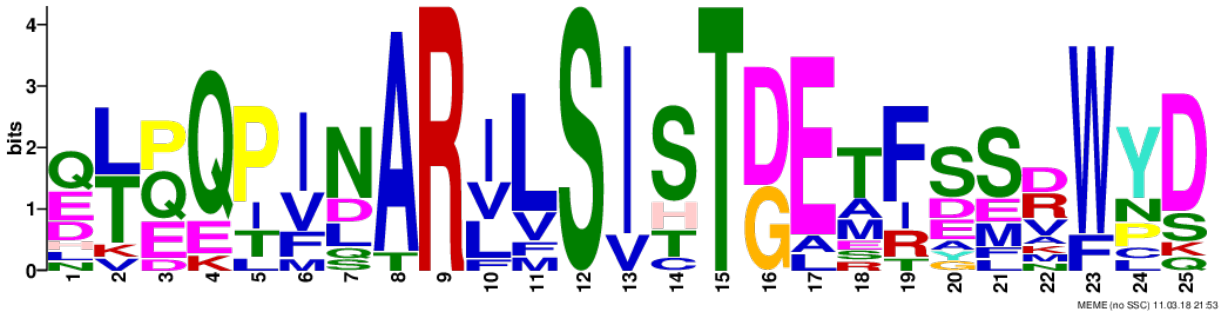

Motif 7:

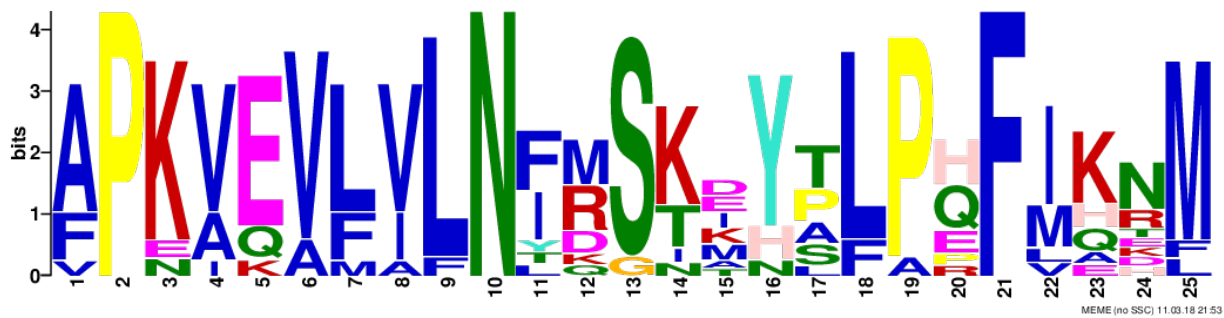

Motif 12: L1

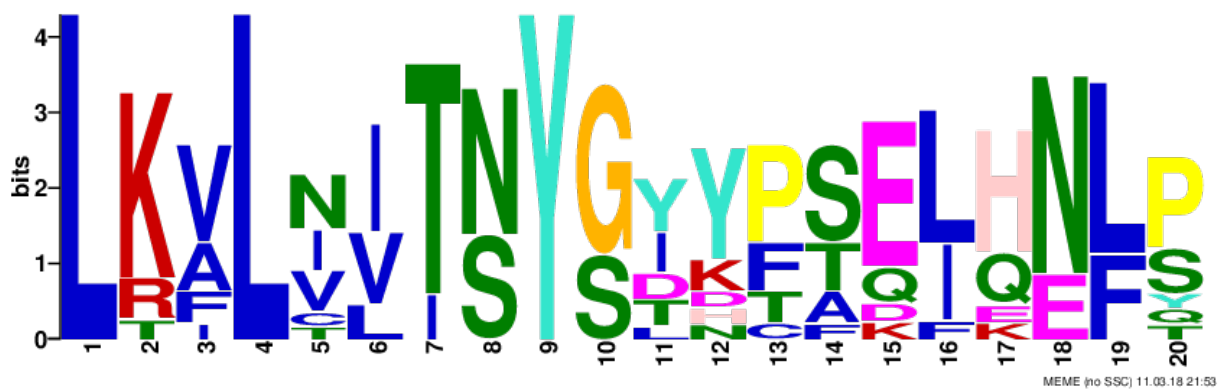

Motif 17:L2

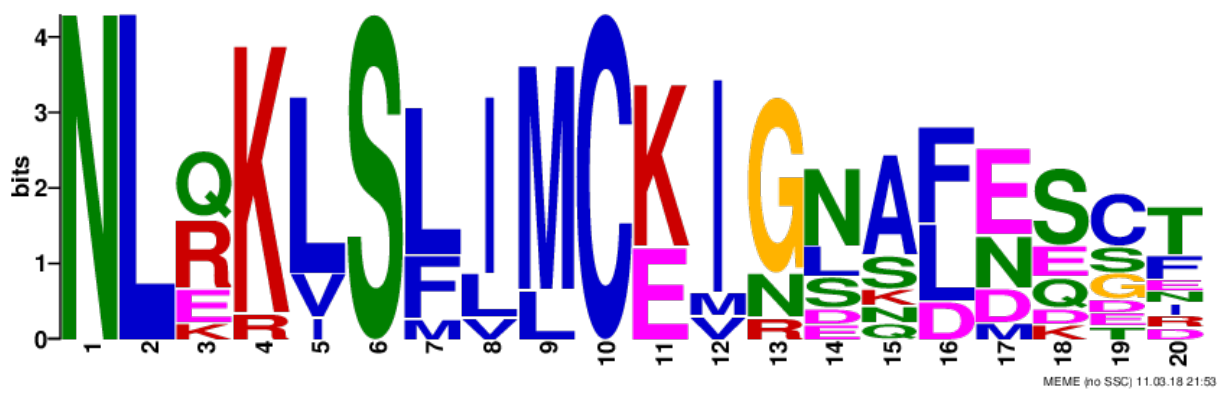

Motif 9:L3

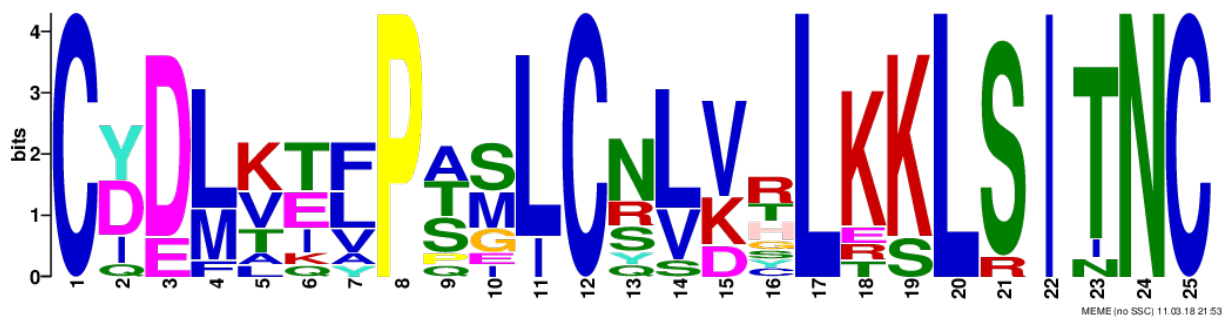

Motif 11:L4

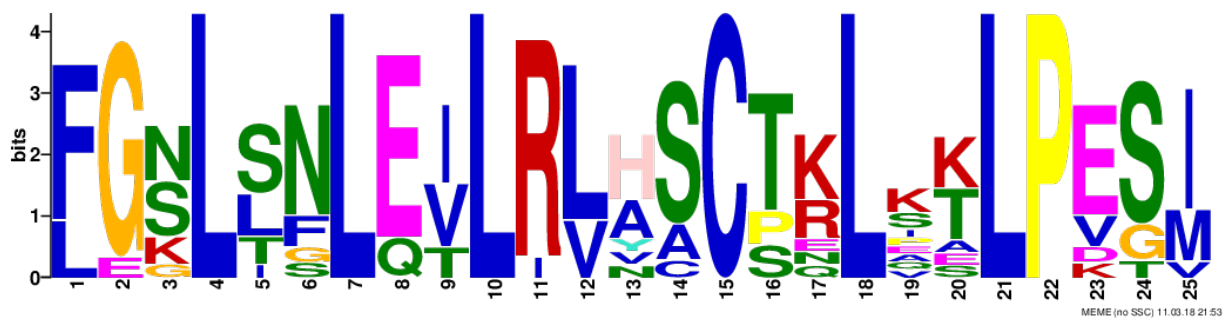

Motif 13: L5

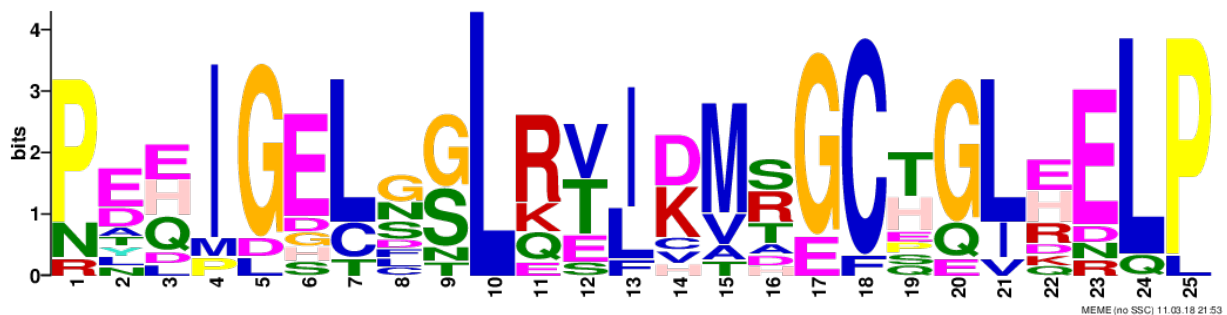

Motif 15:

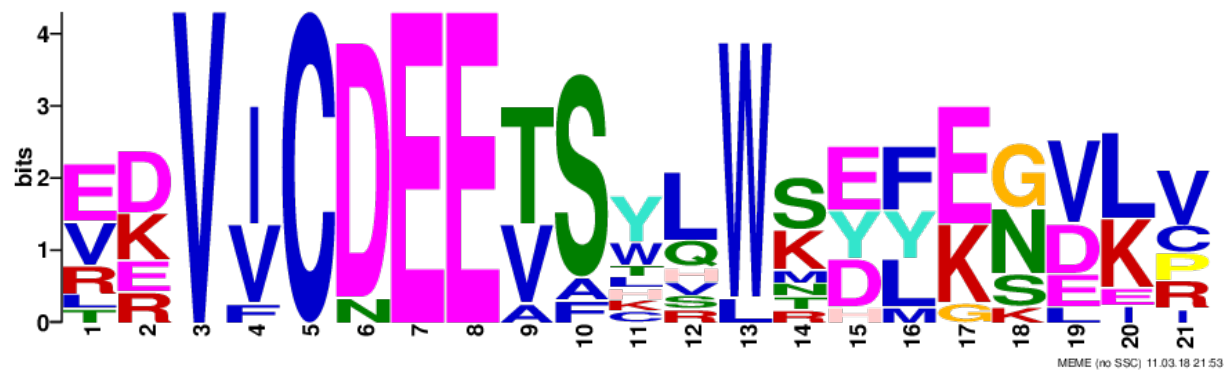

Supplement: s1 [file s1]
