# Supplementary material for: Genome-Wide Identification of NBS-Encoding Resistance Genes in Sunflower (Helianthus annuus L.)
Source: MDPI journal article supplement (doi:10.3390/genes9080384), 2018-07-30
Supplement: s1 [file s1]

**Table S3.** Conserved MEME motifs in sunflower CNL family of proteins. The motif logos represented in column three are shown in Supplementary File S1a.

| Domain | Motif number | Motif           | Motif Sequence                                                                                                                  | Length | E value   |
|--------|--------------|-----------------|---------------------------------------------------------------------------------------------------------------------------------|--------|-----------|
| CC     | Motif 14     | C1              | MA[ED][TA][LAI]A[SN][EA]L[LV]KV[LV][FV][KE]K[LM]T[DS]EAFKR[IF]AR[AS]Q                                                           | 29     | 7.5e-1109 |
|        | Motif 3      | C2              | [TD][LF]S[RQ]IQ[DA][LV]LNDA[SE][QE]KE[VI][TK][HE][KE][SA]VK[LSE]WLNAL[QR][HS][LA][AS]YD[IV][DE][DN]VLDD[LVI][AS]TE[AD][ML][HL]R | 50     | 1.0e-2772 |
|        | Motif 10     | C3              | P[ST]CCTNFSL[TS]HR[LM][SH][PH]KLDSI[NT][RT][EK]L[EQ][ND]LEK[RQE]KTDLGL                                                          | 36     | 3.0e-1407 |
| NBS    | Motif 2      | P loop          | [VI][LV]PI[VW]GMGG[VL]GKTTLARL[LV]YN                                                                                            | 21     | 8.7e-1518 |
|        | Motif 8      | RNBS A          | [HY]FE[LP]KAWV[CY]VSDDF[DQ][IV]FKI[ST][KD][TA][LFI]Q                                                                            | 25     | 3.8e-1315 |
|        | Motif 4      | Kinase 2+RNBS B | KRFLLV[LV]DDVWSENY[GD]DWE[NT]LVRPF[LH]SCAPGS[RK]IIMTTRKE                                                                        | 41     | 4.2e-2089 |
|        | Motif 15     | RNBS C          | LS[HNE]ED[AS][LW][RSL]LF[AK][LVK]HA[LF]                                                                                         | 15     | 4.0e-599  |
|        | Motif 7      | GLPL            | PIG[ER]GIVKKCGGLPLA[LI]K[TVA][IL][GA]R[LS][LM]R                                                                                 | 25     | 6.7e-183  |
|        | Motif 5      | RNBSD+CNBS1     | YH[DE]LS[AP][DH]LK[QR][LC]FAY[CF]SLFPK[DG][FY]LFDK[ED]EL[VI][LS]LW[MV]AEGF[LI]NP                                                | 41     | 3.1e-2273 |
|        | Motif 1      | MHDL            | RSFFQHAPNDESLF[IV]MHDLMNDLAT[FS]VAGEFFLRFDN[HE]M[KE]T                                                                           | 41     | 3.7e-1966 |
| LRR    | Motif 18     | L1              | [FCY]YLS[SN]KIL[DV]DLLPEL[TP]LLRVLS                                                                                             | 22     | 3.3e-761  |
|        | Motif 6      | L2              | PE[FS]IG[ST]LKHLRYLNLSRTNI[KE]ELPE[NS][VI]GNLYNLQTLI[VL][SF]GC                                                                  | 41     | 1.1e-2102 |
|        | Motif 16     | L3              | [GS]LTKLP[KN][SG][FL][LS][KN]LK[NRK]LRH[LF]DIR[DG]T                                                                             | 23     | 6.9e-735  |
|        | Motif 9      | L4              | GFAI[NT]ELK[GD]LTNLHG[EK][VI]SIEGLHKVQSA[KM]HAREANL                                                                             | 36     | 2.8e-1446 |
|        | Motif 17     | L5              | CL[KR]ELV[IV][KR][ND]CP[NQ]L[IV][DQN]VS[LP][EQ]ALPSL[NKR]VLEI[DYS][RKE]C[GD][SD]GVLRLVQ[VA]AS[SG]VTKL                           | 50     | 6.9e-801  |
|        | Motif 19     | L6              | [KE]I[ES]SISGL[TDN][DY][VE]VWRGVIEYL[GK][AE]VE[EY]L[SR]IKNCNEI[RK]YLWES[EM][AT][ES][AK][SA][KL][VIL]L[VL][RN]                   | 50     | 5.2e-625  |

**Table S4.** Conserved MEME motifs in sunflower TNL family of proteins. The motif logos represented in column three are shown in Supplementary File S1b.

| Domain     | Motif number    | Motif           | Motif Sequence                                              | Length | E value   |
|------------|-----------------|-----------------|-------------------------------------------------------------|--------|-----------|
| <b>TIR</b> | <b>Motif 1</b>  | <b>TIR 1</b>    | FRGEDTRK[TNS]F[VT]DHLY                                      | 15     | 1.7e-836  |
|            | <b>Motif 2</b>  | <b>TIR 4</b>    | [[IV][IV]V[FL]SKNYASSSWCLDEL[VA][KL]I[ML]E[CQ][QK]          | 25     | 6.4e-1078 |
|            | <b>Motif 3</b>  | <b>TIR2</b>     | [HQ][TI][VA]YP[VI]FY[DH]V[ED]P[ST][DE]VR[KN]Q[SK]GS[VF]GEA  | 25     | 1.0e-1170 |
|            | <b>Motif 9</b>  | <b>TIR 3</b>    | W[RK][KN]AL[KT]E[AV]A[ND]L[SA]GW[EVD]LK[NG]TA[ND]GHEA       | 25     | 4.3e-816  |
| <b>NBS</b> | <b>Motif 4</b>  | <b>P loop</b>   | VR[MI][ILV]GI[KWC]G[MI]GG[GIS]GKTTLA[RK][AY][VI][FY][DN]xI  | 25     | 1.6e-1149 |
|            | <b>Motif 20</b> | <b>RNBS A</b>   | [GD]L[LK]KLQ[KE][QK][LI]L[SK]D[IVL]L[KNG]                   | 25     | 2.5e-291  |
|            | <b>Motif 5</b>  | <b>Kinase 2</b> | [KR]VL[VIL]VLDD[VI]DDI[DE]QLEALAG[TS][HP]NWF                | 25     | 2.3e-1000 |
|            | <b>Motif 10</b> | <b>RNBS B</b>   | [KG][PS]GSRIITTRDE[QH][VL]LIAH[RK]V                         | 21     | 7.3e-631  |
|            | <b>Motif 11</b> | <b>RNBS C</b>   | L[SN]D[ED]E[AS][IL]EL[FL][SN][RK][HY]AF                     | 15     | 1.8e-486  |
|            | <b>Motif 6</b>  | <b>GLPL</b>     | VV[HS]Y[AC][AG]GLPL[AT][LI]KVLGS[FS]L[CY][GD]               | 21     | 2.3e-843  |
|            | <b>Motif 17</b> | <b>TNBS I</b>   | [RK]LKTIP[LNE]KE[TIV]L[KE][KR]L[EK][LI]S[YF]DGL             | 21     | 2.4e-378  |
|            | <b>Motif 12</b> | <b>RNBS D</b>   | [EQY]KE[LI]FL[DH][IV]AC[FI][FL][KRV]G[EW]                   | 21     | 7.2e-415  |
|            | <b>Motif 7</b>  | <b>MHDL</b>     | MHD[LH][LI][QE]EMG[RK]NIVRR[EL][SH]P[DN]EP                  | 15     | 1.2e-522  |
| <b>LRR</b> | <b>Motif 18</b> | <b>L1</b>       | [KR][HR]SR[LV]WIKL[ED][IS][EY]D[VI]L                        | 15     | 1.6e-376  |
|            | <b>Motif 16</b> | <b>L2</b>       | L[RQ][WY]LCWHG[YF]P[LF][SK][CS][LIF]P[KS][TD][FL]Q[AMP][NE] | 21     | 5.6e-472  |

**Table S5.** Conserved MEME motifs in sunflower RPW8 family of proteins. The motif logos represented in column three are shown in Supplementary File S1c.

| Domain | Motif number | Motif    | Motif Sequence                                                           | Length | E value   |
|--------|--------------|----------|--------------------------------------------------------------------------|--------|-----------|
| RPW8   | Motif 19     | RPW8-1   | DR[PR][EK]EET[EDTK][MR]F[IM][FIS][HLY]L[EK][QNK][GA][KE][EK]LV[VL]KC[SE] | 25     | 1.5e-055  |
|        | Motif 8      | RPW8-2   | WN[VL]Y[KQ][KR][FY]V[HY][AS][NS]KL[ID][RK]L[ND][KNH][ESK]LLR[FY][FV]Q    | 25     | 3.3e-092  |
| NBS    | Motif 1      | P loop   | V[VL]VVS[AG][PA]GG[CS]GKTTL[VA][KTR][ML][LF]C[HR]D[NPD][ED][IV]          | 25     | 4.4e-166  |
|        | Motif 14     | RNBS A   | [KQ][GE]IFG[ED]NI[LFY][FY]VT[VI]S[RE]T[TPY][SND]LK[VT]                   | 21     | 2.0e-062  |
|        | Motif 18     | Kinase 2 | LLVLDDVW[SA]ES                                                           | 11     | 3.4e-052  |
|        | Motif 5      | RNBS B   | IQD[LF][KM]F[KQ][IS]PG[YC]K[IV]LVTSR[FI][LT]F                            | 21     | 2.2e-110  |
|        | Motif 6      | RNBS C   | TY[EK]L[GS]LLND[EQ]DA[RT][TS]L[FL]C[HY]SAF[PS][REC]D[GS]                 | 25     | 1.4e-109  |
|        | Motif 3      | GLPL     | KCKKG[HLF]PLAL[TSK]V[IV]G[AG]SL[RCK][GD]QP[EV][LA]KW                     | 25     | 6.6e-141  |
|        | Motif 2      | RNBS D   | C[FY]LDLG[SL]FPED[QEK][KR]I[ASP]A[TS][AVT]LMDMW[VA][EH]                  | 21     | 7.2e-415  |
|        | Motif 4      | QHDL     | VTQHD[LVM][LM]R[ED]LAIH[LM]SSQE[PS]                                      | 19     | 3.8e-104  |
| LRR    | Motif 12     | L1       | LK[VA]L[NIV][IV]T[NS]Y[GS][YI]Y[PF][ST]E[LI][HQ][NE][LF][PS]             | 20     | 1.5e-071  |
|        | Motif 17     | L2       | NL[QR]KLS[LF]IMC[KE]IGNA[FL][EN]SCT                                      | 20     | 3.0e-057  |
|        | Motif 9      | L3       | C[DY]D[LM][KV][TE][FL]P[STA][SM]LCN[LV][VK]RLKKLSITNC                    | 25     | 7.1e-101  |
|        | Motif 11     | L4       | [FL]G[NS]L[SL]NLE[IV]LR[LV][HA]SCT[KR]LK[TK]LPES[IM]                     | 25     | 8.2e-083  |
|        | Motif 13     | L5       | PE[HEQ]IGELG[GS]LR[TV][IL][DK]M[RS]GC[TH]GL[EH]ELP                       | 25     | 8.06e-064 |
